# Supplementary material
Source: publisher figshare collection journal article supplement (https://tandf.figshare.com/ndownloader/files/13369922)

## SUPPLEMENTARY MATERIAL

### Piptolinic acids F–J, five new lanostane-type triterpenoids from *Piptoporus betulinus*

Qosimjon Khalilov,<sup>a,b</sup> Liya Li,<sup>c</sup> Yushuang Liu,<sup>a,b</sup> Zeynep Tohtahon,<sup>a,b</sup> Xiaoyu Chen,<sup>a,b</sup>

Haji Akber Aisa<sup>a</sup> and Tao Yuan<sup>a,\*</sup>

<sup>a</sup>The Key Laboratory of Plant Resources and Chemistry of Arid Zone, and State Key Laboratory of Xinjiang Indigenous Medicinal Plants Resource Utilization, Xinjiang Technical Institute of Physics and Chemistry, Chinese Academy of Sciences, Urumqi 830011, China

<sup>b</sup>University of Chinese Academy of Sciences, Beijing 100049, China

<sup>c</sup>Institute of Microbial Pharmaceuticals, College of Life and Health Sciences, Northeastern University, Shenyang 110819, China

#### ABSTRACT:

Five new lanostane triterpenoids, named piptolinic acids F–J (**1–5**), as well as seven known analogues (**6–12**), were isolated from methanolic extract of the fruiting bodies of *Piptoporus betulinus*. Compounds **1–4** are 24-methyl-lanostane triterpenoids, while compound **5** is a 3,4-*seco*-lanostane derivative. Their structures were established on the basis of extensive spectroscopic analysis (1D, 2D NMR, and HRESIMS). Cytotoxicity evaluation indicated that compound **6** exhibited moderate cytotoxic activity against human melanoma cell line A-375 (IC<sub>50</sub> = 42.8 μM) and human renal carcinoma cell line 786-O (IC<sub>50</sub> = 56.5 μM).

**Keywords:** *Piptoporus betulinus*; Polyporaceae; Lanostane triterpenoid; Cytotoxicity; A-375; 786-O

## Lists of content

|             |                                                                                                       |
|-------------|-------------------------------------------------------------------------------------------------------|
| Table S1.   | $^1\text{H}$ and $^{13}\text{C}$ NMR data of compounds <b>1</b> and <b>2</b>                          |
| Table S2.   | $^1\text{H}$ and $^{13}\text{C}$ NMR data of compounds <b>3–5</b>                                     |
| Figure S1.  | $^1\text{H}$ NMR spectrum of piptolinic acid F ( <b>1</b> ) in $\text{CD}_3\text{OD}$                 |
| Figure S2.  | $^{13}\text{C}$ NMR spectrum of piptolinic acid F ( <b>1</b> ) in $\text{CD}_3\text{OD}$              |
| Figure S3.  | $^1\text{H}$ - $^1\text{H}$ COSY spectrum of piptolinic acid F ( <b>1</b> ) in $\text{CD}_3\text{OD}$ |
| Figure S4.  | HSQC spectrum of piptolinic acid F ( <b>1</b> ) in $\text{CD}_3\text{OD}$                             |
| Figure S5.  | HMBC spectrum of piptolinic acid F ( <b>1</b> ) in $\text{CD}_3\text{OD}$                             |
| Figure S6.  | NOESY spectrum of piptolinic acid F ( <b>1</b> ) in $\text{CD}_3\text{OD}$                            |
| Figure S7.  | HRESIMS spectrum of piptolinic acid F ( <b>1</b> )                                                    |
| Figure S8.  | IR (KBr disc) spectrum of piptolinic acid F ( <b>1</b> )                                              |
| Figure S9.  | $^1\text{H}$ NMR spectrum of piptolinic acid G ( <b>2</b> ) in $\text{CD}_3\text{OD}$                 |
| Figure S10. | $^{13}\text{C}$ NMR spectrum of piptolinic acid G ( <b>2</b> ) in $\text{CD}_3\text{OD}$              |
| Figure S11. | HRESIMS spectrum of piptolinic acid G ( <b>2</b> )                                                    |
| Figure S12. | $^1\text{H}$ NMR spectrum of piptolinic acid H ( <b>3</b> ) in $\text{C}_5\text{D}_5\text{N}$         |
| Figure S13. | $^{13}\text{C}$ NMR spectrum of piptolinic acid H ( <b>3</b> ) in $\text{C}_5\text{D}_5\text{N}$      |
| Figure S14. | HRESIMS spectrum of piptolinic acid H ( <b>3</b> )                                                    |
| Figure S15. | $^1\text{H}$ NMR spectrum of piptolinic acid I ( <b>4</b> ) in $\text{C}_5\text{D}_5\text{N}$         |
| Figure S16. | $^{13}\text{C}$ NMR spectrum of piptolinic acid I ( <b>4</b> ) in $\text{C}_5\text{D}_5\text{N}$      |
| Figure S17. | HRESIMS spectrum of piptolinic acid I ( <b>4</b> )                                                    |
| Figure S18. | $^1\text{H}$ NMR spectrum of piptolinic acid J ( <b>5</b> ) in $\text{CD}_3\text{OD}$                 |
| Figure S19. | $^{13}\text{C}$ NMR spectrum of piptolinic acid J ( <b>5</b> ) in $\text{CD}_3\text{OD}$              |

Figure S20.  $^1\text{H}$ - $^1\text{H}$  COSY spectrum of piptolinic acid J (**5**) in  $\text{CD}_3\text{OD}$

Figure S21. HSQC spectrum of piptolinic acid J (**5**) in  $\text{CD}_3\text{OD}$

Figure S22. HMBC spectrum of piptolinic acid J (**5**) in  $\text{CD}_3\text{OD}$

Figure S23. HRESIMS spectrum of piptolinic acid J (**5**)

Table S1.  $^1\text{H}$  and  $^{13}\text{C}$  NMR data of compounds **1** and **2**<sup>a</sup> (in  $\text{CD}_3\text{OD}$ )

| position | <b>1</b>                             |                     | <b>2</b>                             |                     |
|----------|--------------------------------------|---------------------|--------------------------------------|---------------------|
|          | $\delta_{\text{H}}$ (mult, $J$ , Hz) | $\delta_{\text{C}}$ | $\delta_{\text{H}}$ (mult, $J$ , Hz) | $\delta_{\text{C}}$ |
| 1        | 2.26 (m), 1.57 (m)                   | 28.4                | 1.85 (m), 1.79 (m)                   | 28.7                |
| 2        | 2.24 (m), 1.77 (m)                   | 24.5                | 2.26 (m), 1.72 (m)                   | 24.8                |
| 3        | 3.59 (brs)                           | 74.2                | 3.61 (brs)                           | 75.5                |
| 4        |                                      | 41.5                |                                      | 41.8                |
| 5        |                                      | 176.6               |                                      | 173.0               |
| 6        | 6.00 (s)                             | 125.5               | 6.16 (s)                             | 126.0               |
| 7        |                                      | 202.5               |                                      | 186.4               |
| 8        | 3.08 (s)                             | 52.8                |                                      | 139.0               |
| 9        |                                      | 141.8               |                                      | 165.6               |
| 10       |                                      | 39.8                |                                      | 43.6                |
| 11       | 5.55 (d, 5.7)                        | 118.1               | 2.46 (2H, m)                         | 23.1                |
| 12       | 2.17 (m), 1.84 (m)                   | 34.7                | 1.93 (m), 1.64 (m)                   | 28.4                |
| 13       |                                      | 45.3                |                                      | 47.4                |
| 14       |                                      | 45.3                |                                      | 47.1                |
| 15       | 2.31 (m), 1.89 (m)                   | 47.0                | 2.44 (m), 2.17 (d, 14.4)             | 44.6                |
| 16       | 4.02 (t, 7.2)                        | 76.1                | 4.07 (t, 7.3)                        | 77.0                |
| 17       | 2.05 (m)                             | 55.0                | 2.07 (m)                             | 54.4                |
| 18       | 0.83 (3H, s)                         | 15.2                | 0.79 (3H, s)                         | 16.8                |
| 19       | 1.41 (3H, s)                         | 29.6                | 1.44 (3H, s)                         | 27.9                |
| 20       | 2.41 (m)                             | 47.1                | 2.40 (m)                             | 47.3                |
| 21       |                                      | 178.3               |                                      | 179.2               |
| 22       | 2.06 (m), 1.74 (m)                   | 30.3                | 2.09 (m), 1.77 (m)                   | 30.6                |
| 23       | 2.02 (2H, m)                         | 32.0                | 2.07 (m), 2.00 (m)                   | 32.2                |
| 24       |                                      | 155.2               |                                      | 155.5               |
| 25       | 2.25 (m)                             | 33.5                | 2.26 (m)                             | 33.8                |
| 26       | 1.01 (3H, d, 7.0)                    | 20.9                | 1.03 (3H, d, 6.8)                    | 21.1                |
| 27       | 1.03 (3H, d, 6.7)                    | 20.8                | 1.04 (3H, d, 6.9)                    | 21.0                |
| 28       | 1.20 (3H, s)                         | 25.8                | 1.25 (3H, s)                         | 27.1                |
| 29       | 1.23 (3H, s)                         | 29.5                | 1.32 (3H, s)                         | 28.0                |
| 30       | 0.89 (3H, s)                         | 17.1                | 1.17 (3H, s)                         | 23.9                |
| 31       | 4.75 (s), 4.72 (s)                   | 106.0               | 4.77 (s), 4.74 (s)                   | 106.2               |

<sup>a</sup> Recorded at 400 or 100 MHz for  $^1\text{H}$  and  $^{13}\text{C}$ , respectively.

Table S2. <sup>1</sup>H and <sup>13</sup>C NMR data of compounds **3–5**<sup>a</sup>

| position | <b>3</b> <sup>b</sup>                     |                     | <b>4</b> <sup>b</sup>                     |                     | <b>5</b> <sup>c</sup>                     |                     |
|----------|-------------------------------------------|---------------------|-------------------------------------------|---------------------|-------------------------------------------|---------------------|
|          | $\delta_{\text{H}}$ (mult, <i>J</i> , Hz) | $\delta_{\text{C}}$ | $\delta_{\text{H}}$ (mult, <i>J</i> , Hz) | $\delta_{\text{C}}$ | $\delta_{\text{H}}$ (mult, <i>J</i> , Hz) | $\delta_{\text{C}}$ |
| 1        | 2.02 (m), 1.44 (m)                        | 31.2                | 2.34 (m), 1.84 (m)                        | 31.8                | 1.72 (2H, m)                              | 34.0                |
| 2        | 2.02 (m), 1.81 (m)                        | 27.3                | 2.29 (m), 1.93 (m)                        | 27.1                | 2.32 (m), 1.96 (m)                        | 30.6                |
| 3        | 3.64 (brs)                                | 75.5                | 3.77 (brs)                                | 75.8                |                                           | 178.5               |
| 4        |                                           | 38.6                |                                           | 41.6                |                                           | 148.8               |
| 5        | 2.00 (m)                                  | 45.0                |                                           | 152.3               | 2.19 (m)                                  | 48.3                |
| 6        | 1.71 (m), 1.60 (m)                        | 19.0                | 6.18 (d, 6.2)                             | 119.5               | 1.75 (m), 1.55 (m)                        | 25.3                |
| 7        | 2.13 (m), 2.01 (m)                        | 27.1                | 5.76 (d, 6.2)                             | 117.2               | 1.98 (m), 1.38 (m)                        | 28.0                |
| 8        |                                           | 135.0               |                                           | 141.3               |                                           | 140.3               |
| 9        |                                           | 135.8               |                                           | 147.8               |                                           | 130.9               |
| 10       |                                           | 37.9                |                                           | 41.9                |                                           | 41.6                |
| 11       | 2.12 (m), 2.04 (m)                        | 21.5                | 5.87 (d, 5.9)                             | 120.6               | 2.11 (m), 1.96 (m)                        | 22.8                |
| 12       | 2.21 (m), 2.01 (m)                        | 30.2                | 2.74 (d, 8.3), 2.51 (m)                   | 37.5                | 1.74 (m), 1.50 (m)                        | 30.3                |
| 13       |                                           | 46.7                |                                           | 45.4                |                                           | 45.3                |
| 14       |                                           | 49.3                |                                           | 49.7                |                                           | 51.7                |
| 15       | 2.42 (m), 1.70 (m)                        | 44.1                | 2.48 (m), 2.00 (d, 13.1)                  | 44.7                | 1.65 (m), 1.26 (m)                        | 31.7                |
| 16       | 4.54 (t, 7.0)                             | 77.2                | 4.56 (t, 6.9)                             | 77.2                | 2.00 (2H, m)                              | 27.1                |
| 17       | 2.81 (dd, 11.1, 7.0)                      | 57.8                | 2.88 (dd, 11.2, 6.9)                      | 57.8                | 2.07 (m)                                  | 48.4                |
| 18       | 1.18 (3H, s)                              | 18.2                | 1.16 (3H, s)                              | 18.2                | 0.83 (3H, s)                              | 16.7                |
| 19       | 1.06 (3H, s)                              | 19.8                | 1.41 (3H, s)                              | 36.6                | 0.97 (3H, s)                              | 22.8                |
| 20       | 2.96 (m)                                  | 49.2                | 2.98 (m)                                  | 49.0                | 2.24 (m)                                  | 49.4                |
| 21       |                                           | 179.3               |                                           | 179.1               |                                           | 180.6               |
| 22       | 2.66 (m), 2.45 (m)                        | 32.1                | 2.67 (m), 2.47 (m)                        | 31.9                | 1.52 (2H, m)                              | 33.7                |
| 23       | 2.54 (m), 2.40 (m)                        | 33.7                | 2.54 (m), 2.39 (m)                        | 33.7                | 1.98 (m), 1.92 (m)                        | 27.0                |
| 24       |                                           | 156.6               |                                           | 156.5               | 5.11 (t, 7.1)                             | 124.9               |
| 25       | 2.30 (m)                                  | 34.6                | 2.30 (m)                                  | 34.6                |                                           | 133.0               |
| 26       | 1.00 (3H, d, 6.9)                         | 22.5                | 1.00 (3H, d, 6.8)                         | 22.5                | 1.67 (3H, s)                              | 25.9                |
| 27       | 1.01 (3H, d, 6.8)                         | 22.3                | 1.01 (3H, d, 6.8)                         | 22.3                | 1.59 (3H, s)                              | 17.8                |
| 28       | 0.94 (3H, s)                              | 23.1                | 1.46 (3H, s)                              | 29.2                | 4.91 (s), 4.71 (s)                        | 114.5               |
| 29       | 1.24 (3H, s)                              | 29.5                | 1.33 (3H, s)                              | 32.6                | 1.78 (3H, s)                              | 23.5                |
| 30       | 1.41 (3H, s)                              | 25.8                | 1.40 (3H, s)                              | 27.1                | 0.98 (3H, s)                              | 25.7                |
| 31       | 5.00 (s), 4.86 (s)                        | 107.5               | 5.00 (s), 4.86 (s)                        | 107.5               |                                           |                     |

<sup>a</sup> Recorded at 400 or 100 MHz for <sup>1</sup>H and <sup>13</sup>C, respectively; <sup>b</sup> in pyridine-*d*<sub>5</sub>; <sup>c</sup> in CD<sub>3</sub>OD.

Figure S1.  $^1\text{H}$  NMR spectrum of piptolinic acid **1** in  $\text{CD}_3\text{OD}$

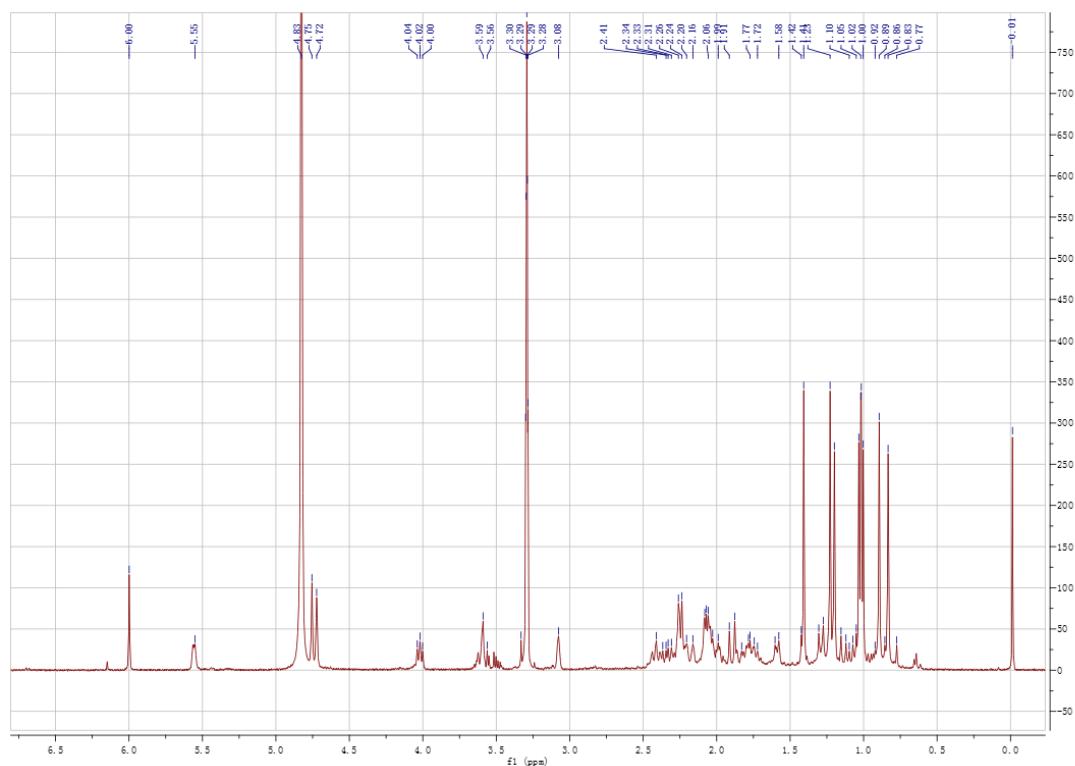

Figure S2.  $^{13}\text{C}$  NMR spectrum of piptolinic acid **1** in  $\text{CD}_3\text{OD}$

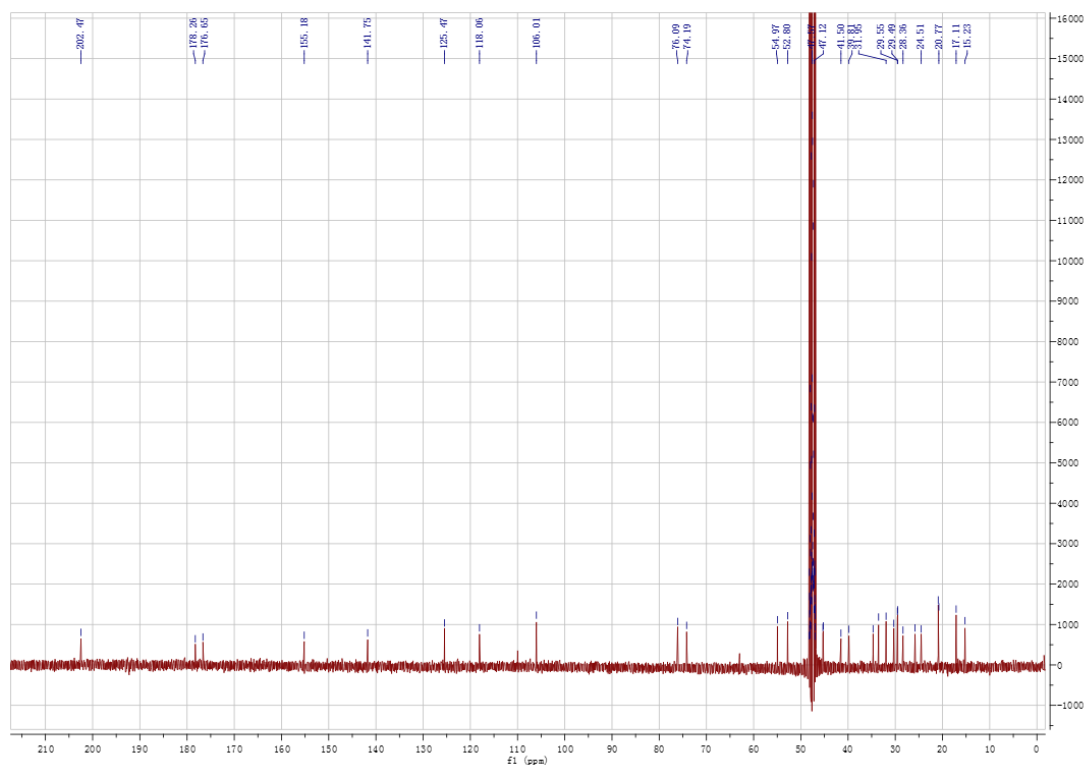

Figure S3.  $^1\text{H}$ - $^1\text{H}$  COSY spectrum of piptolinic acid F (**1**) in  $\text{CD}_3\text{OD}$

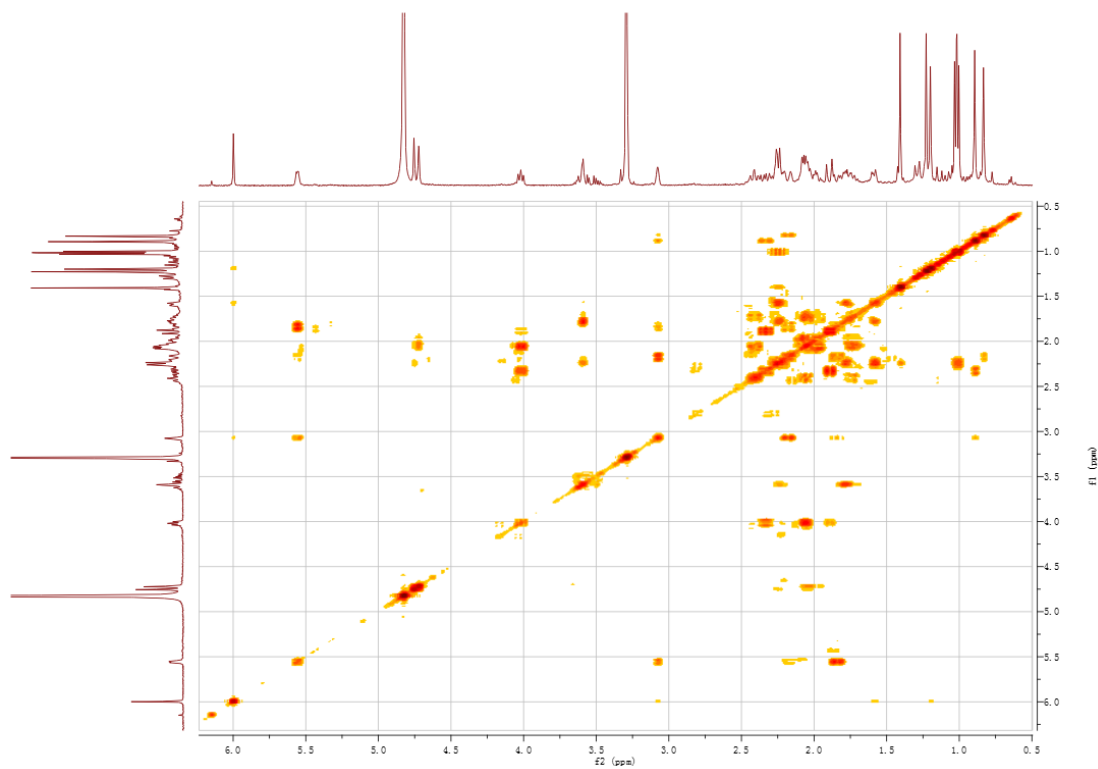

Figure S4. HSQC spectrum of piptolinic acid F (**1**) in  $\text{CD}_3\text{OD}$

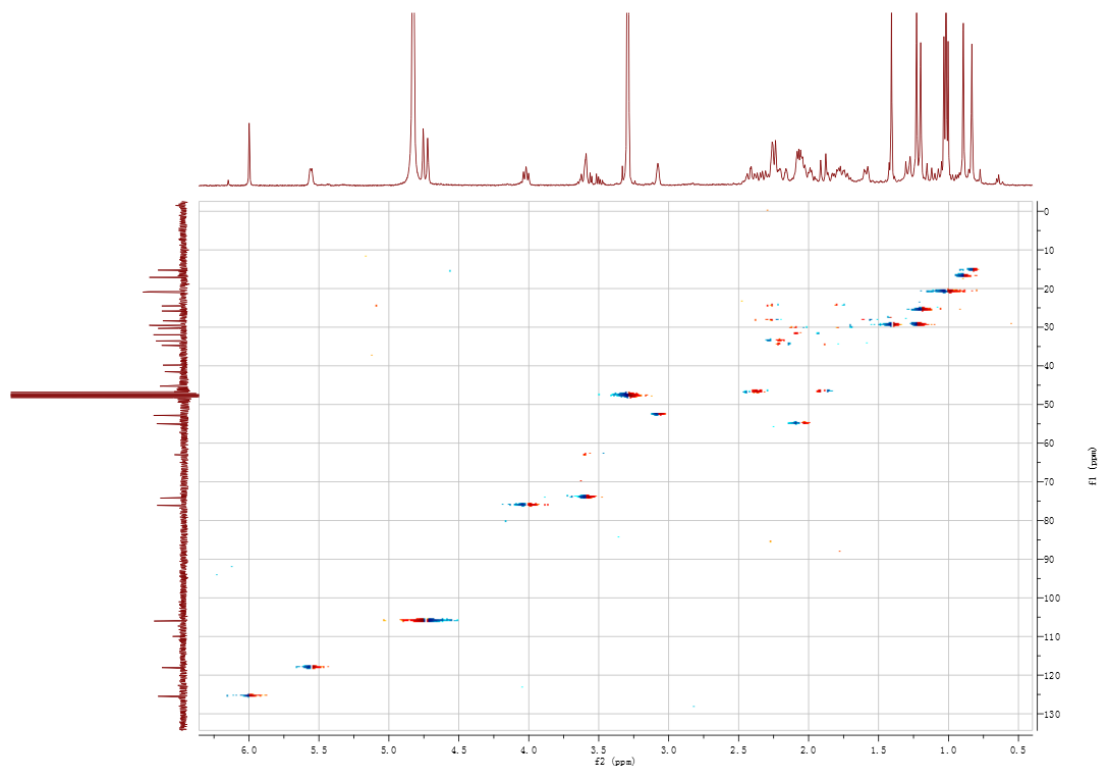

Figure S5. HMBC spectrum of piptolinic acid F (**1**) in CD<sub>3</sub>OD

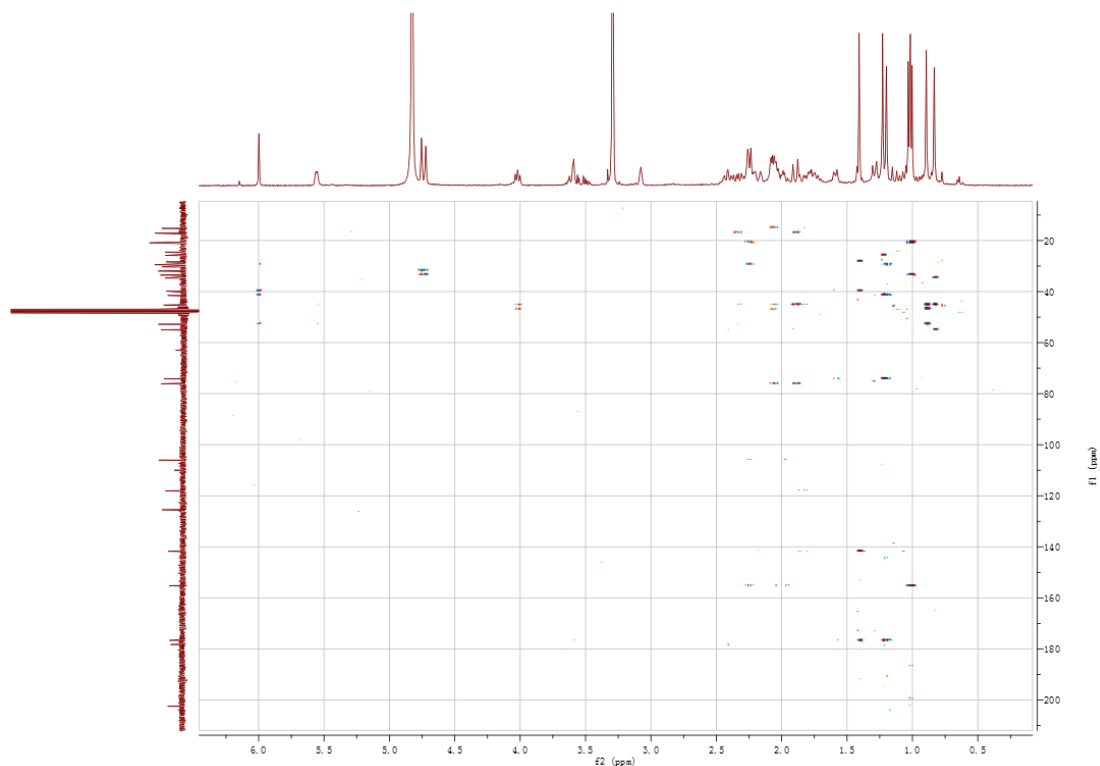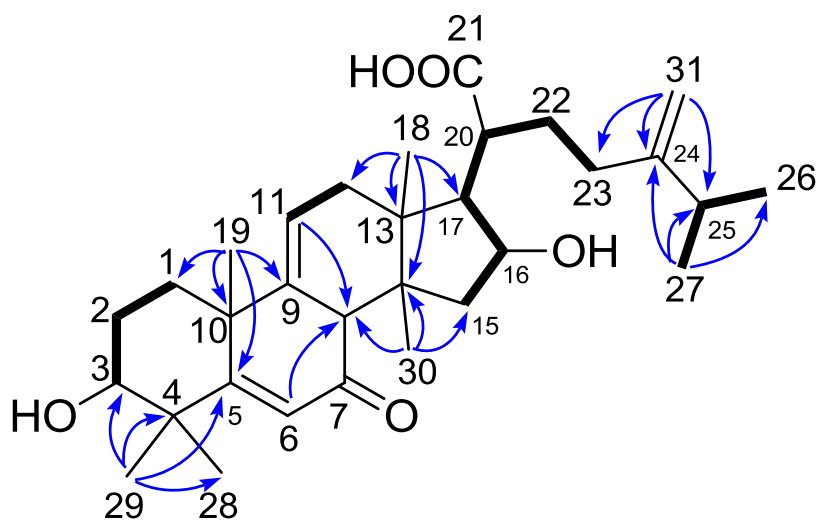

Key  $^1\text{H}$ - $^1\text{H}$  COSY (—) and selected HMBC correlations (H→C) of **1**



Figure S6. NOESY spectrum of piptolinic acid F (**1**) in CD<sub>3</sub>OD

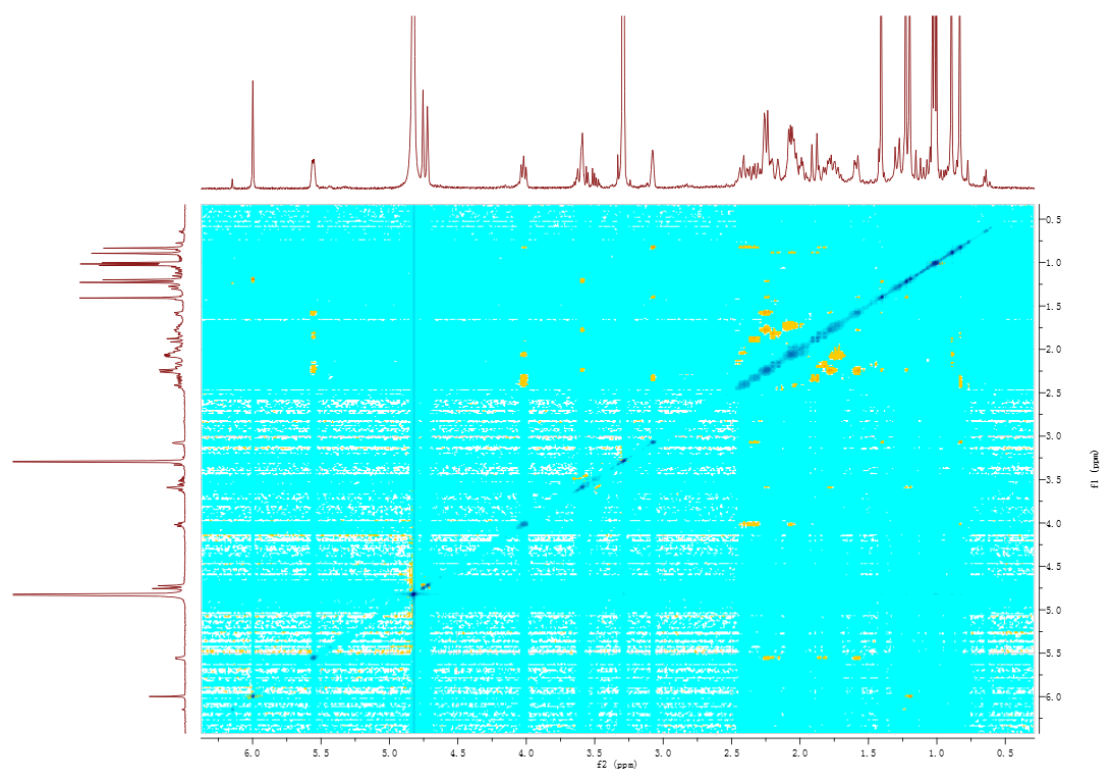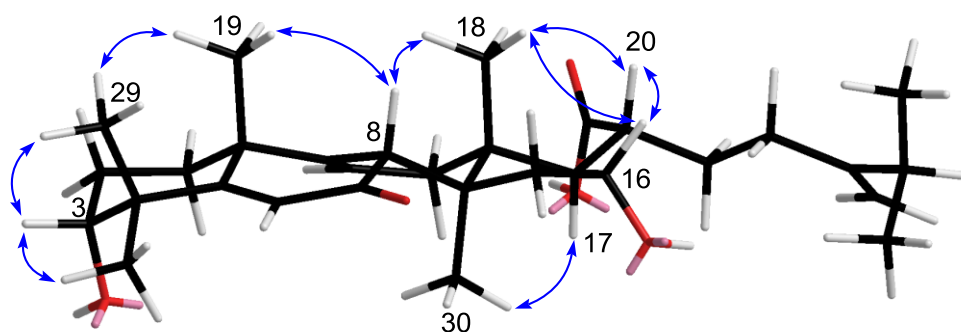

Key NOESY correlations (H $\leftrightarrow$ H) of **1**

Figure S7. HRESIMS spectrum of piptolinic acid F (1)

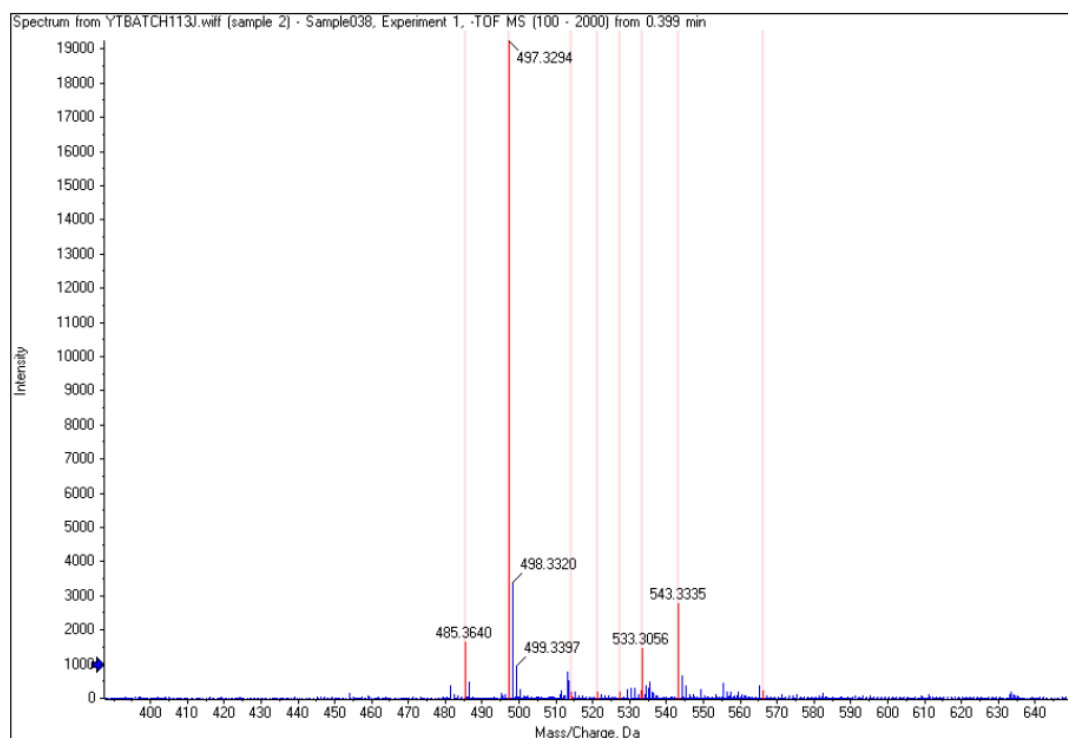

Figure S8. IR (KBr disc) spectrum of piptolinic acid F (1)

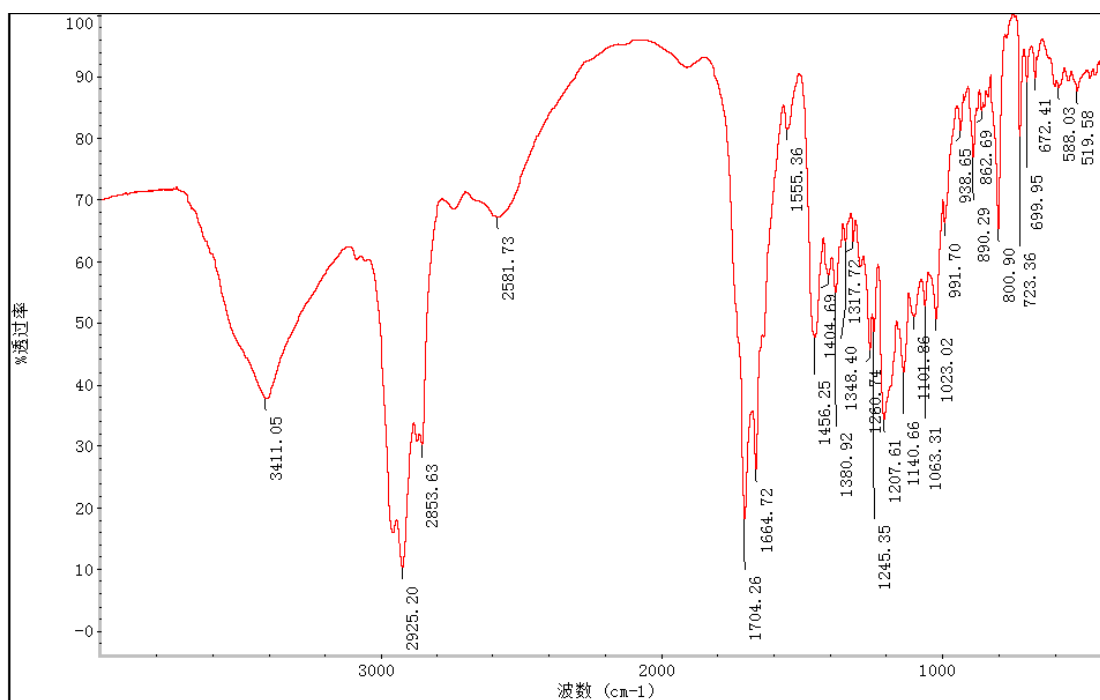

Figure S9.  $^1\text{H}$  NMR spectrum of piptolinic acid G (**2**) in  $\text{CD}_3\text{OD}$

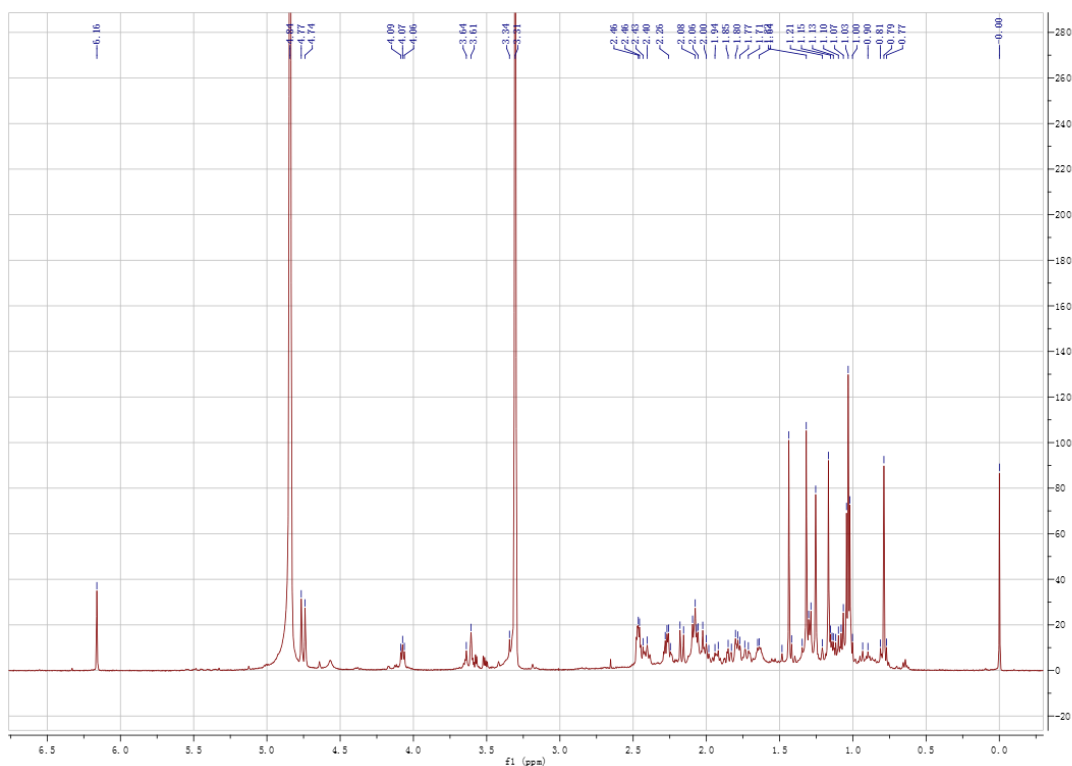

Figure S10.  $^{13}\text{C}$  NMR spectrum of piptolinic acid **2** in  $\text{CD}_3\text{OD}$

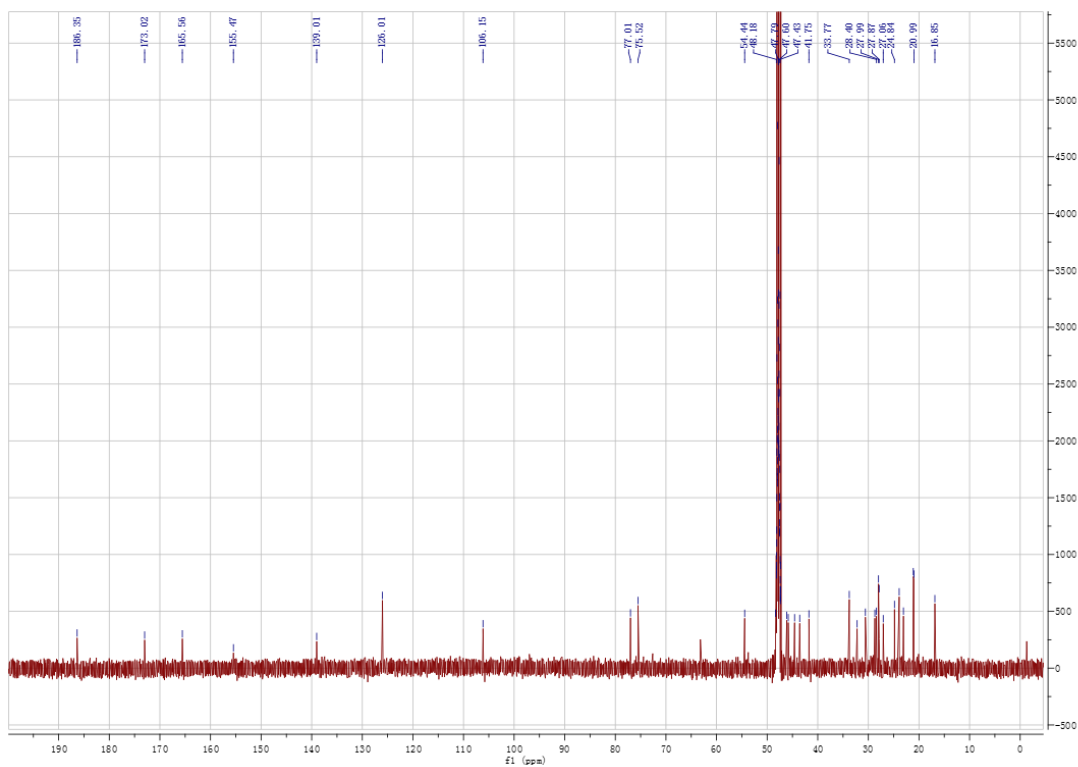

**Figure S11.** HRESIMS spectrum of piptolinic acid G (**2**)

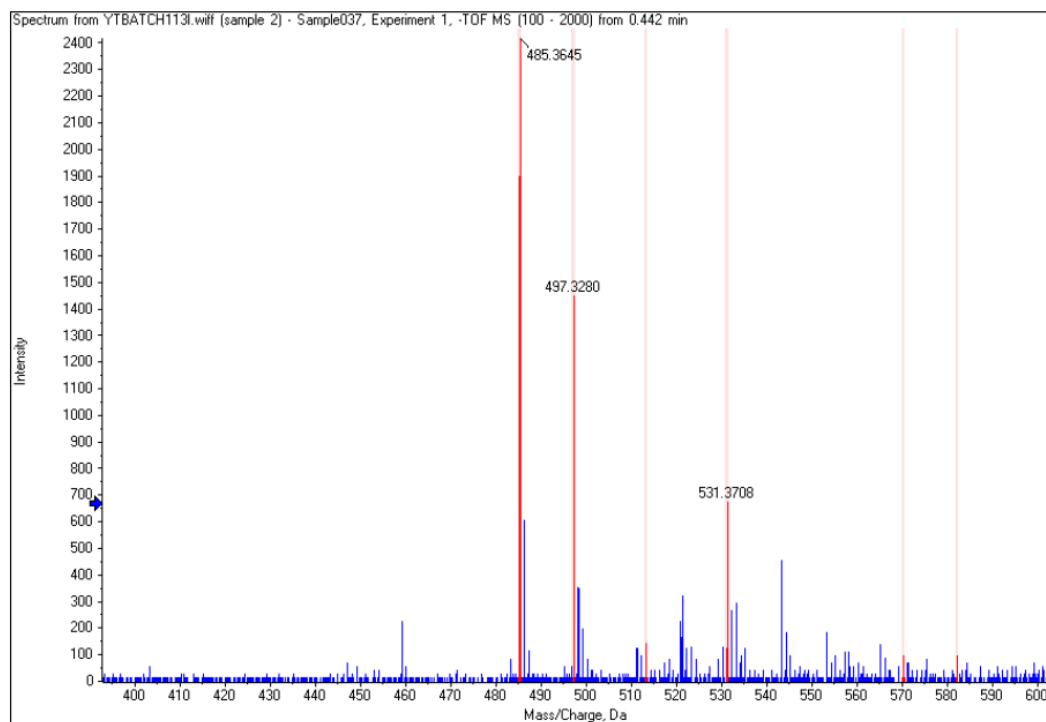

**Figure S12.**  $^1\text{H}$  NMR spectrum of piptolinic acid H (**3**) in  $\text{C}_5\text{D}_5\text{N}$

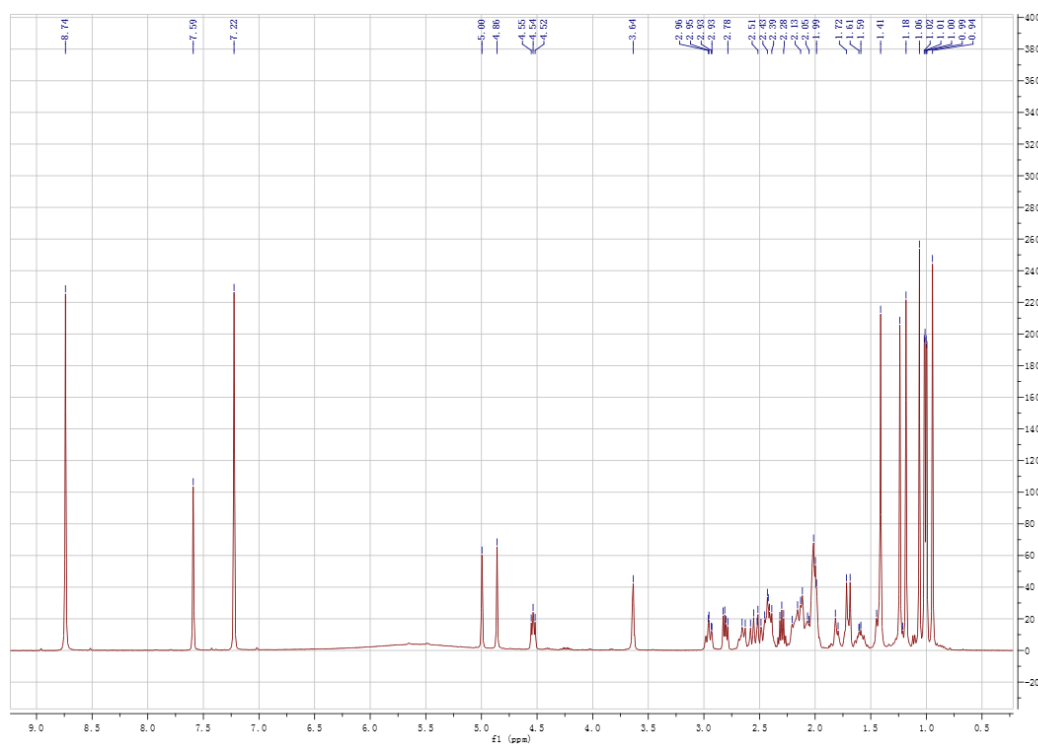

Figure S13.  $^{13}\text{C}$  NMR spectrum of piptolinic acid H (**3**) in  $\text{C}_5\text{D}_5\text{N}$

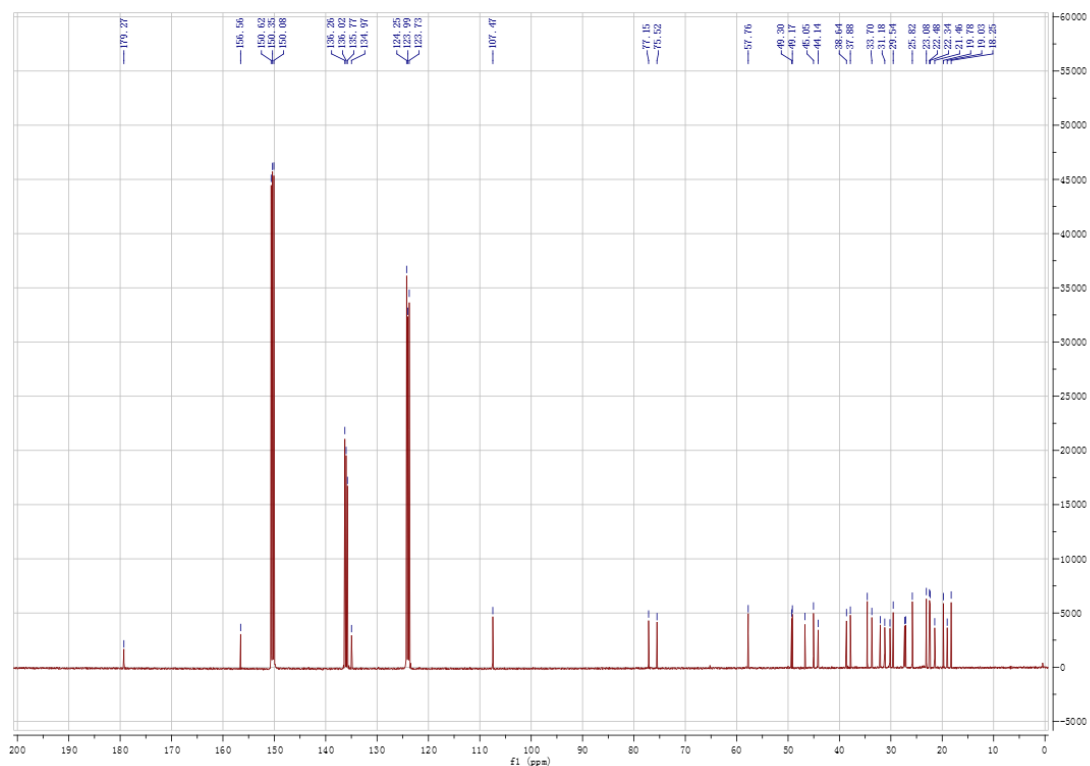

Figure S14. HRESIMS spectrum of piptolinic acid H (**3**)

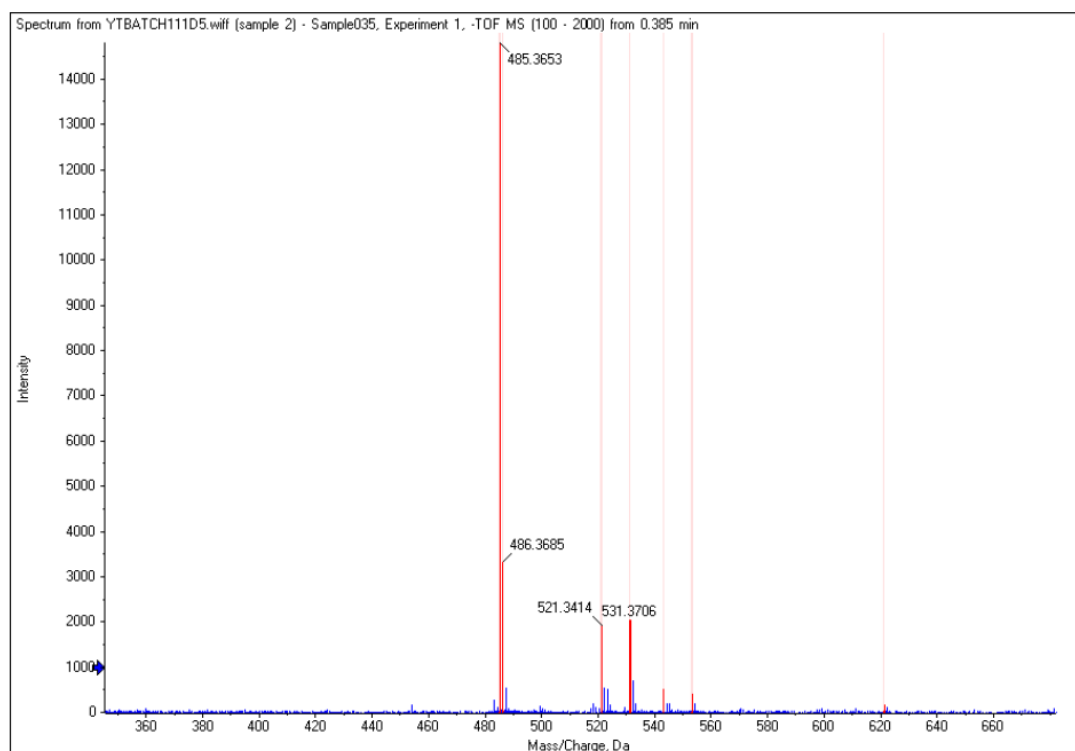

Figure S15.  $^1\text{H}$  NMR spectrum of piptolinic acid I (**4**) in  $\text{C}_5\text{D}_5\text{N}$

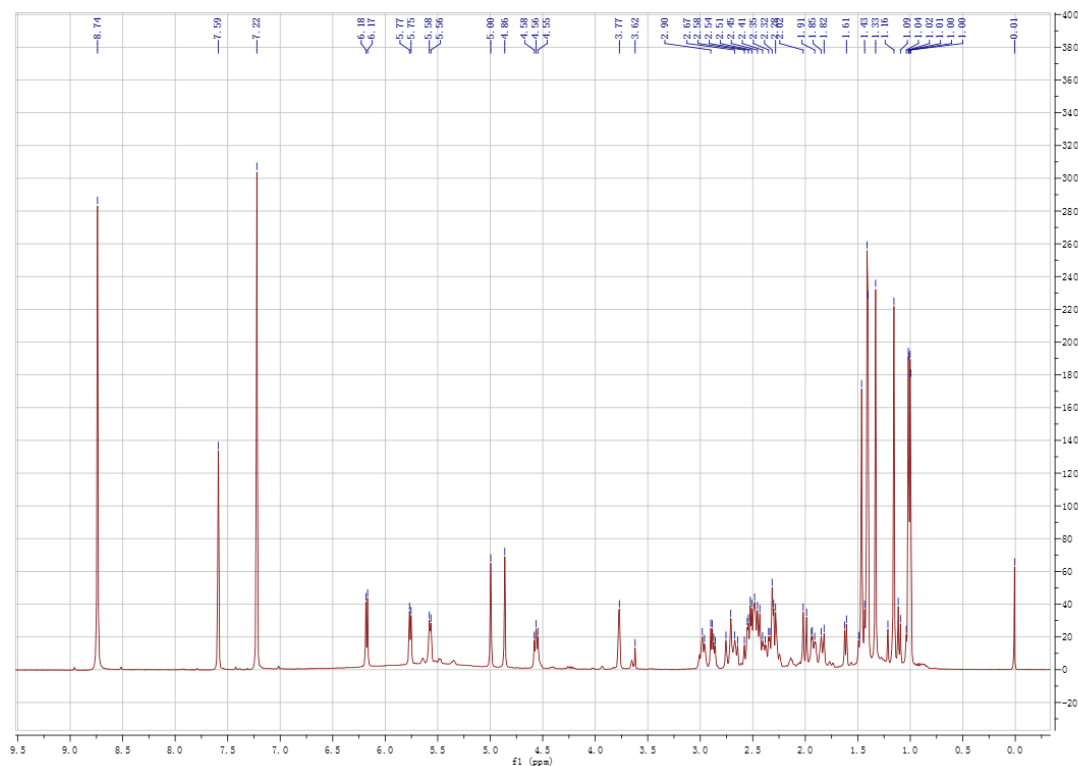

Figure S16.  $^{13}\text{C}$  NMR spectrum of piptolinic acid I (**4**) in  $\text{C}_5\text{D}_5\text{N}$

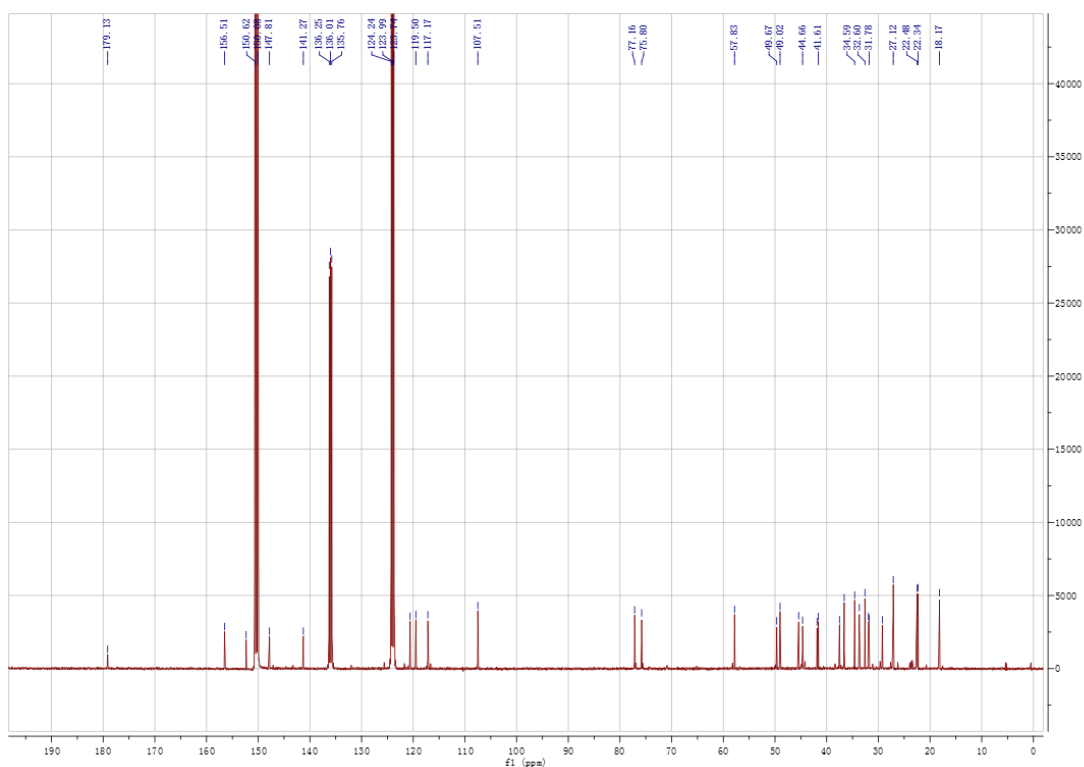

**Figure S17.** HRESIMS spectrum of piptolinic acid I (**4**)

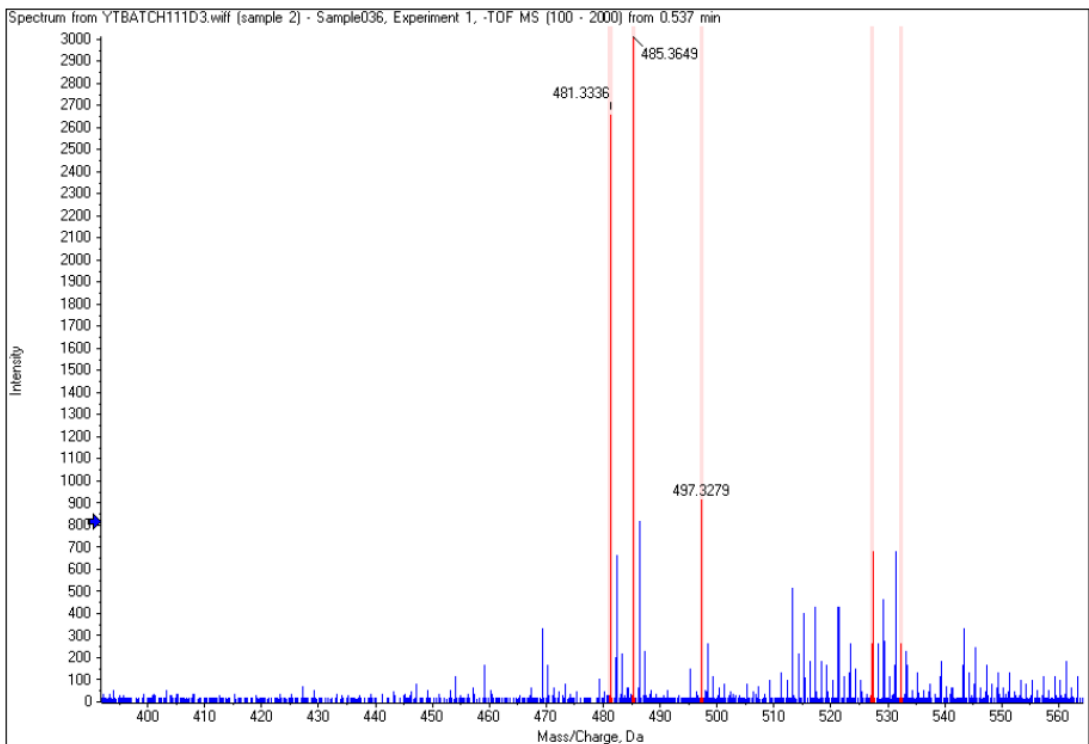

Figure S18.  $^1\text{H}$  NMR spectrum of piptolinic acid J (**5**) in  $\text{CD}_3\text{OD}$

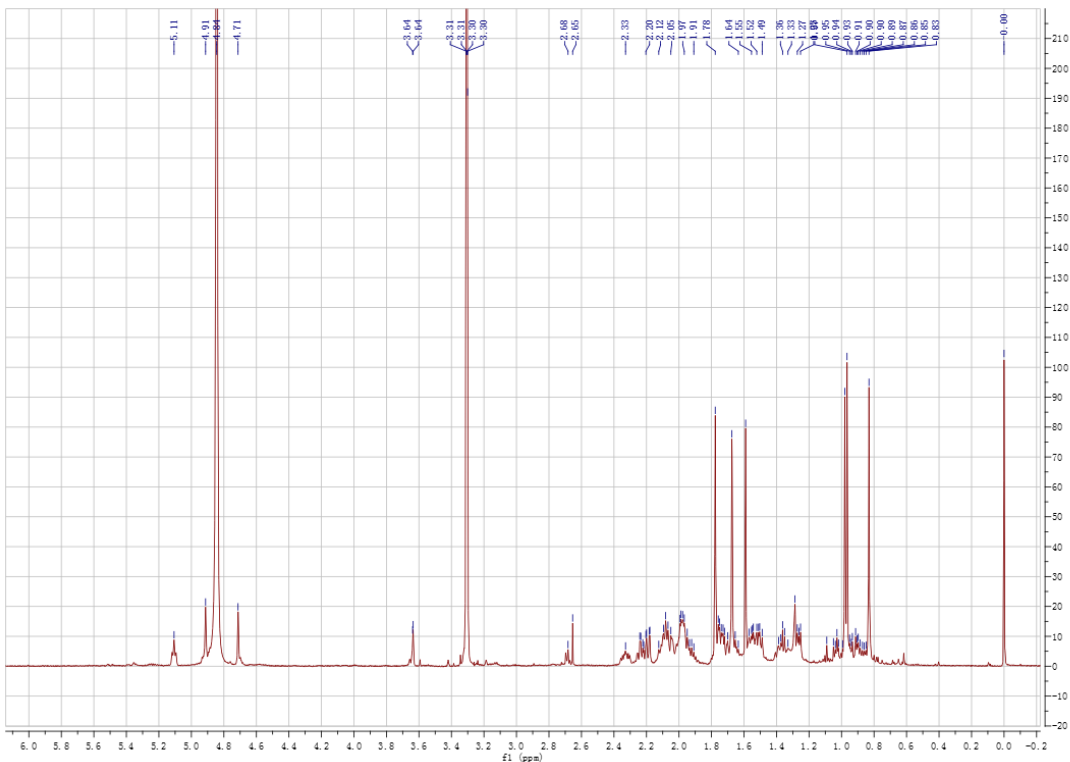

Figure S19.  $^{13}\text{C}$  NMR spectrum of piptolinic acid **5** in  $\text{CD}_3\text{OD}$

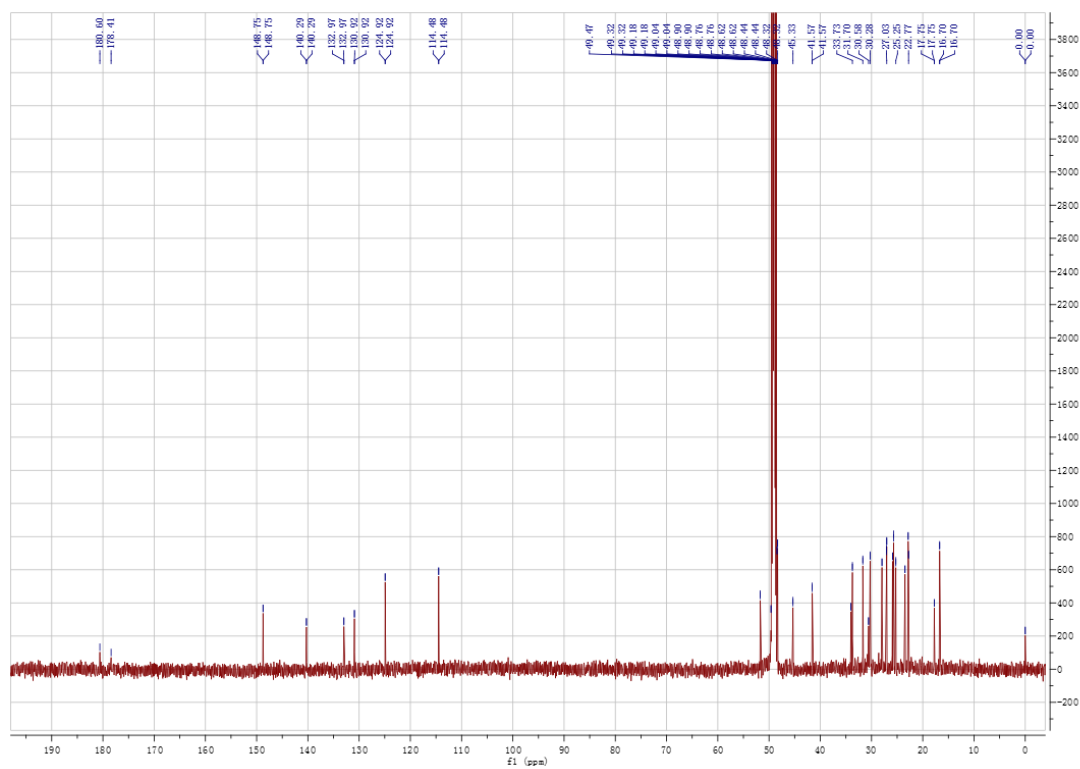

Figure S20.  $^1\text{H}$ - $^1\text{H}$  COSY spectrum of piptolinic acid **5** in  $\text{CD}_3\text{OD}$

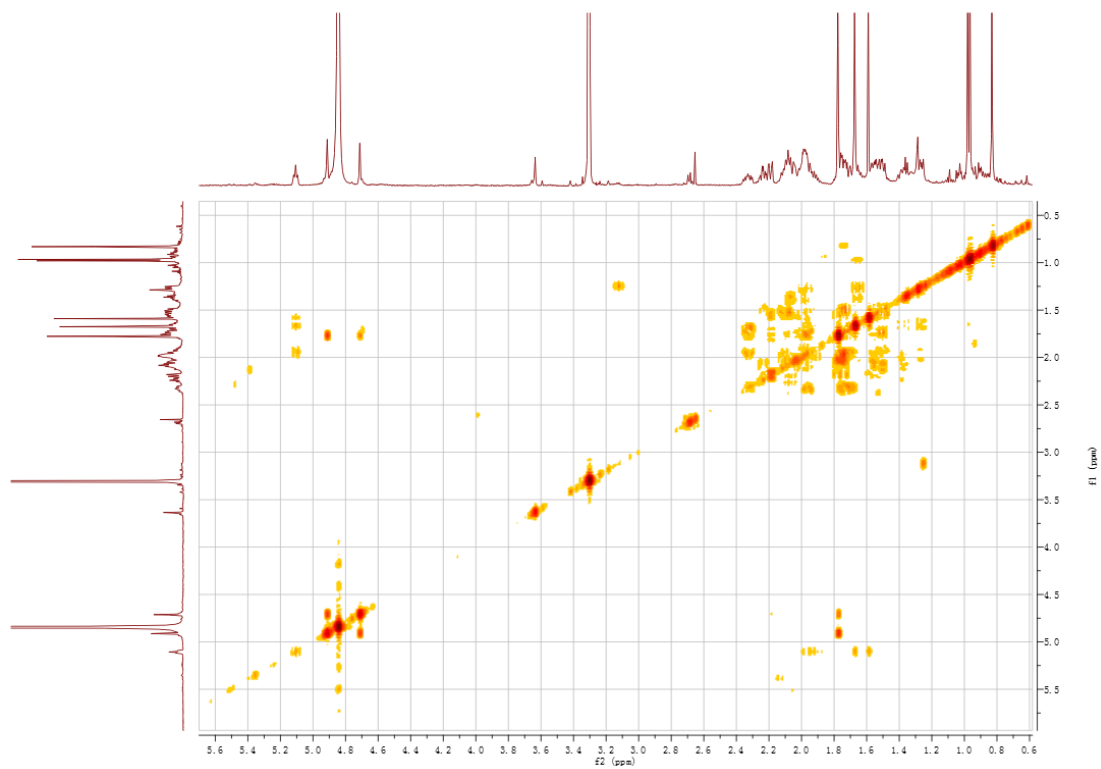



Figure S21. HSQC spectrum of piptolinic acid J (**5**) in CD<sub>3</sub>OD

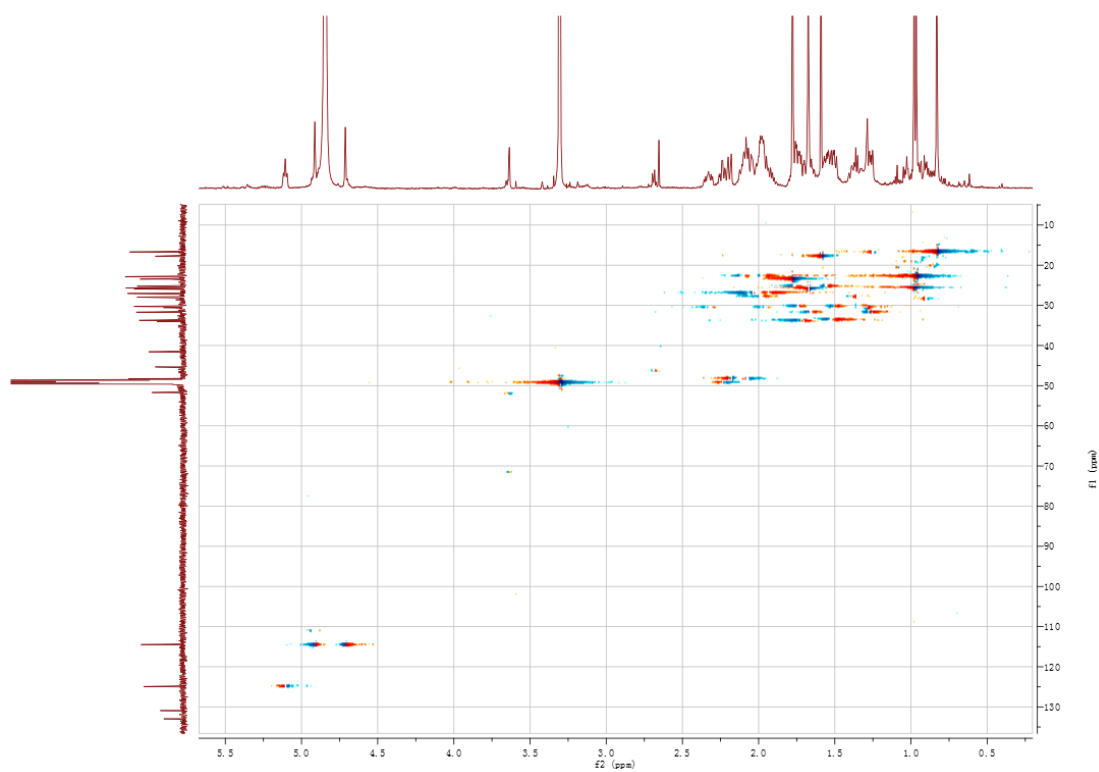

Figure S22. HMBC spectrum of piptolinic acid J (**5**) in CD<sub>3</sub>OD

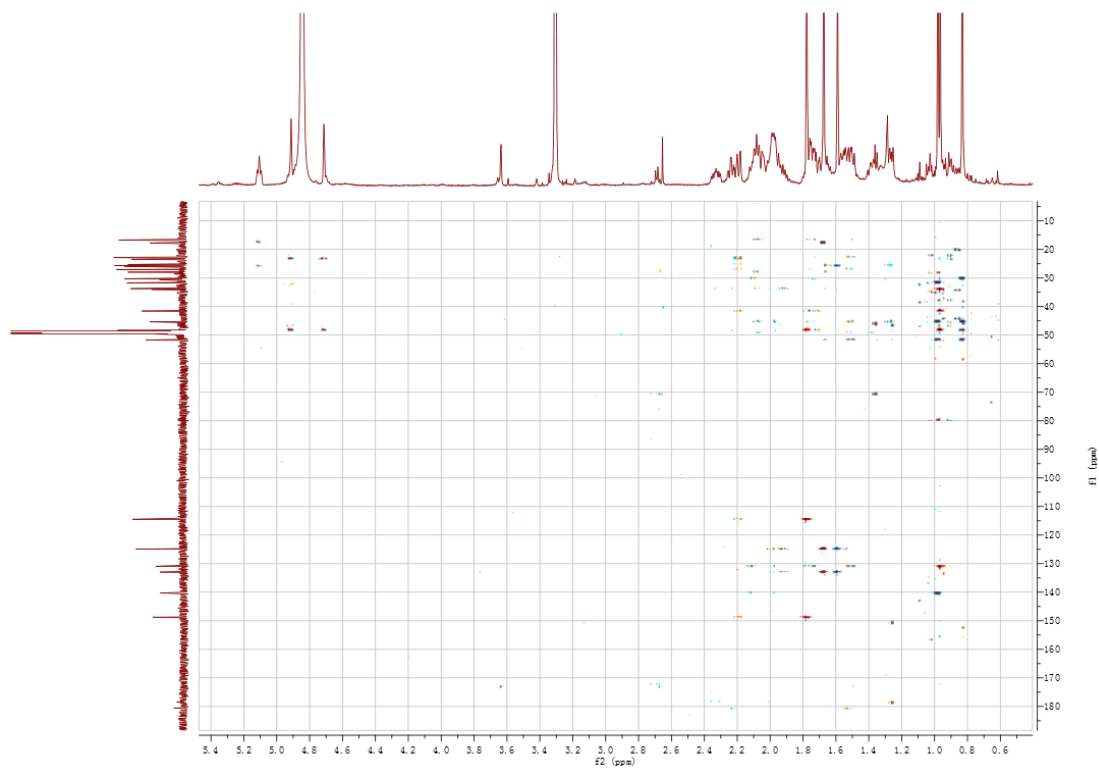

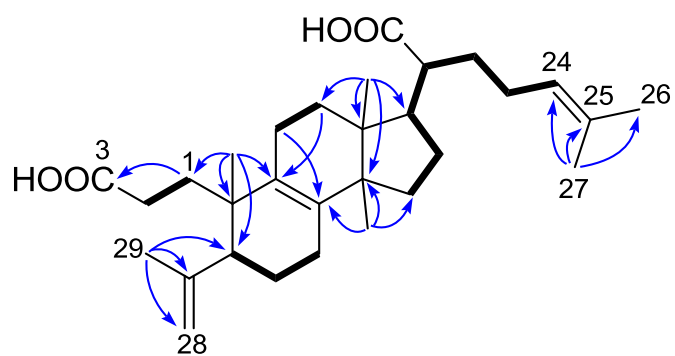

Key  $^1\text{H}$ - $^1\text{H}$  COSY (—) and selected HMBC correlations (H $\rightarrow$ C) of **5**.

Figure S23. HRESIMS spectrum of piptolinic acid J (**5**)

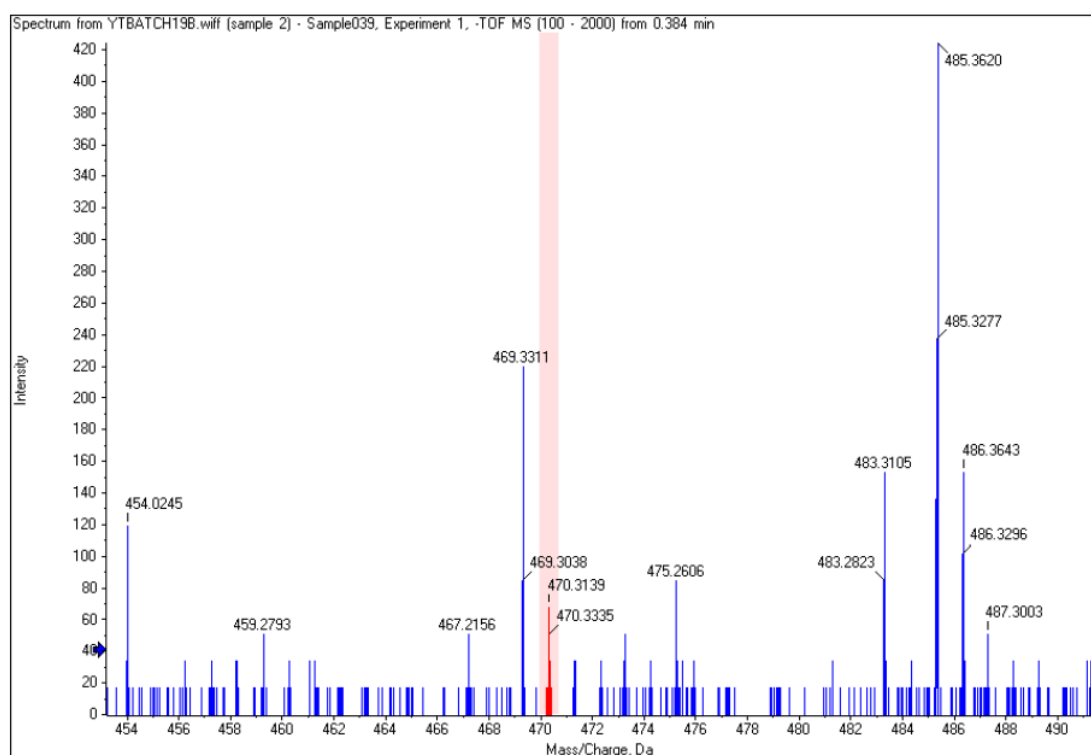

Supplement: Supplementary file 1 [file 13369922]
